# Supplementary material
Source: Springer Nature journal article supplement (https://www.springermedizin.de/resource/supplementary/13075_2008_2475_MOESM4_ESM.pdf/9692170)
Supplement: MOESM4 [file 9692170]

## patient characteristics

|                                                       | <i>total</i> | <i>Missing data</i> | <i>lcSSc</i> | <i>dcSSc</i> | <i>Overlap S.</i> |
|-------------------------------------------------------|--------------|---------------------|--------------|--------------|-------------------|
| Number of patients (n)                                | 1419 (100%)  | 0.9                 | 756 (53.4)   | 492 (34.7)   | 168(11.9)         |
| Female                                                | 82.8         | 0.1                 | 88.0         | 74.9         | 85.1              |
| Male                                                  | 17.2         | 0.1                 | 12.0         | 25.1         | 14.9              |
| ANA positive                                          | 91.5         | 0.5                 | 89.9         | 91.9         | 95.8              |
| Scl 70 positive                                       | 30.9         | 0.7                 | 18.5         | 55.6         | 11.4              |
| ACA positive                                          | 36.6         | 2.5                 | 59.7         | 10.2         | 16.2              |
| <i>percentage of organ involvement by SSc subsets</i> |              |                     |              |              |                   |
|                                                       | <i>total</i> | <i>Missing data</i> | <i>lcSSc</i> | <i>dcSSc</i> | <i>Overlap S.</i> |
| Raynaud Phenomenon                                    | 95.8         | 0.2                 | 96.3         | 95.1         | 96.4              |
| Skin involvement                                      | 93.5         | 0.4                 | 92.8         | 97.5         | 83.9              |
| PAH                                                   | 14.2         | 0.4                 | 12.8         | 17.7         | 9.5               |
| Pulmonary fibrosis                                    | 38.0         | 0.4                 | 24.6         | 59.1         | 33.3              |
| Oesophagus                                            | 63.6         | 0.3                 | 61.1         | 67.4         | 64.9              |
| Stomach                                               | 15.2         | 0.5                 | 15.8         | 14.5         | 14.9              |
| Intestine                                             | 5.7          | 0.5                 | 6.3          | 5.1          | 5.4               |
| Kidney                                                | 12.3         | 0.5                 | 10.3         | 16.1         | 7.1               |
| Heart                                                 | 14.9         | 0.5                 | 11.2         | 21.2         | 11.3              |
| Musculoskeletal system                                | 51.0         | 8.1                 | 45.1         | 53.7         | 68.3              |
| Nervous system                                        | 6.2          | 1.8                 | 5.7          | 5.6          | 10.1              |
| Sicca- symptoms                                       | 42.0         | 2.3                 | 45.5         | 36.9         | 43.4              |
| Masticatory organ                                     | 30.3         | 12.4                | 25.3         | 38.6         | 27.5              |

**Table 1:** Patient characteristics
